# Supplementary material for: Room-temperature synthesis of Ag3PO4 nanoparticles with the assistance of trisodium citrate for photocatalytic dye degradation
Source: Royal Society of Chemistry journal article supplement (doi:10.1039/d2nj01057g), 2022-01-01
Supplement: d2nj01057g1.pdf [file d2nj01057g1.pdf]

## Electronic Supplementary Information

# Room Temperature Synthesis of $\text{Ag}_3\text{PO}_4$ Nanoparticles with the Assistance of Trisodium Citrate for Photocatalytic Dye Degradation

Zhe Wang<sup>a,1</sup>, Xueshuang Li<sup>b,1</sup>, Shengyan Yin<sup>a</sup>, Xingyuan Guo<sup>b,\*</sup>, Weiping Qin<sup>a,\*</sup>

<sup>a</sup>State Key Laboratory on Integrated Optoelectronics, College of Electronic Science and Engineering, Jilin University, Changchun 130012, China

<sup>b</sup>College of Physics, Jilin University, Changchun 130012, China

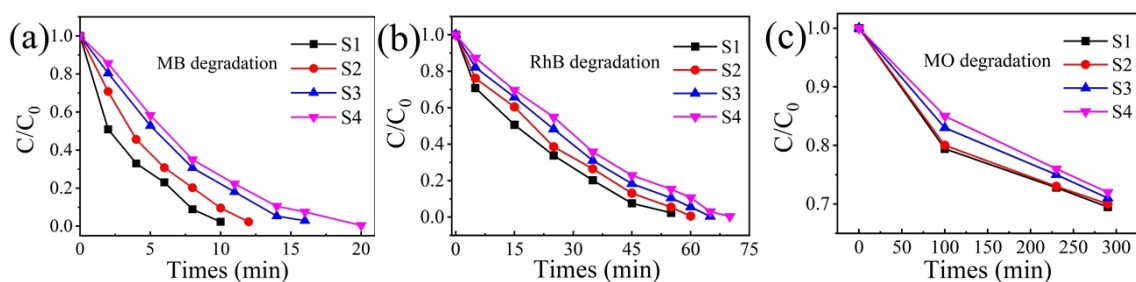

**Fig. 1.** MB (a), RhB (b) and MO (c) photocatalytic activity of the  $\text{Ag}_3\text{PO}_4$  NPs with different size at different reaction times under visible light irradiation.

Fig. 1 show the photodegradation rate of MB, RhB and MO under visible light irradiation. Compared with the photocatalytic capacity of different  $\text{Ag}_3\text{PO}_4$  NPs, the photocatalytic degradation rate of S1 samples is the strongest.

---

\*Corresponding author.

E-mail: guoxy@jlu.edu.cn; wpqin@jlu.edu.cn

<sup>1</sup> These authors contributed equally to this work.

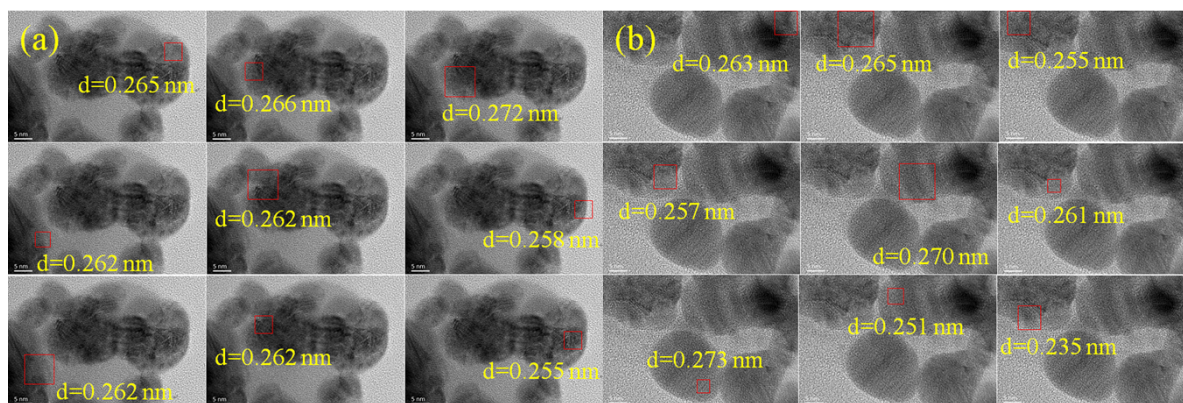

**Fig. 2.** HRTEM images of the  $\text{Ag}_3\text{PO}_4$  NPs before (a) and after (b) catalysis reactions.

Fig 2a, b shows the HRTEM image of  $\text{Ag}_3\text{PO}_4$  NPs before and after catalysis reactions. The lattices fringes are clearly discerned in a different location, which most of fringes (0.260-0.270 nm) belong to  $\text{Ag}_3\text{PO}_4$  NPs. But in Fig 2b, the lattice fringes with a d-spacing of 0.235 nm, which could be matches the (111) reflection of face-centered cubic silver. The lattice fringes with d-spacing of 0.273 nm might be agree with the (111) refection of primitive cubic  $\text{Ag}_2\text{O}$ . [1]

## Reference

1. Li, M.Y., et al., *Out-of-Substrate Ag–Ag<sub>2</sub>O Nanoplates: Surfactantless Photochemical Synthesis, Structural Evolution, and Mechanistic Study*. ACS Omega, 2016. 1(4): p. 696-705.
